# Supplementary material for: Performance evaluation of UKESM1 for surface ozone across the pan-tropics
Source: Copernicus journal article supplement (doi:10.5194/egusphere-2023-2937), 2024-02-06
Supplement: Supplementary file [file egusphere-2023-2937-AC1-supplement.pdf]

Thank you for taking the time to read our manuscript and for the helpful feedback provided.

We have addressed comments as follows:

- Removed reference to ‘statistically significant’ and replaced with language consistent with TOAR guidelines
- Included discussion on new, relevant papers:

Gaudel, A., Bourgeois, I., Li, M., Chang, K.-L., Ziemke, J., Sauvage, B., Stauffer, R. M., Thompson, A. M., Kollonige, D. E., Smith, N., Hubert, D., Keppens, A., Cuesta, J., Heue, K.-P., Veefkind, P., Aikin, K., Peischl, J., Thompson, C. R., Ryerson, T. B., Frost, G. J., McDonald, B. C., and Cooper, O. R.: Tropical tropospheric ozone distribution and trends from in situ and satellite data, *EGUsphere* [preprint], <https://doi.org/10.5194/egusphere-2023-3095>, 2024.

Seguel, R. J., Castillo, L., Opazo, C., Rojas, N. Y., Nogueira, T., Cazorla, M., Gavidia-Calderón, M., Gallardo, L., Garreaud, R., Carrasco-Escaff, T., and Elshorbany, Y.: Changes in South American Surface Ozone Trends: Exploring the Influences of Precursors and Extreme Events, *EGUsphere* [preprint], <https://doi.org/10.5194/egusphere-2024-328>, 2024.

- Made clearer that all data is open access, including Congo (Yangambi), Australia (Daintree) and Panama (Barro Colorado). These data are found in the listed repository.
- Corrected references to ‘data’ in plural
- Spread Fig. S1 across 2 panels to improve readability
